# Supplementary material for: Wild-Grown and Cultivated Glechoma hederacea L.: Chemical Composition and Potential for Cultivation in Organic Farming Conditions
Source: MDPI journal article supplement (doi:10.3390/plants11060819), 2022-03-18
Supplement: s1 [file s1]

**Wild-grown and cultivated *Glechoma hederacea* L.: chemical composition and potential for cultivation in organic farming conditions**

Inga Sile<sup>1,2\*</sup>, Valerija Krizhanovska<sup>1,3</sup>, Ilva Nakurte<sup>4</sup>, Ieva Mezaka<sup>4</sup>, Laura Kalane<sup>4</sup>, Jevgenijs Filipovs<sup>4</sup>, Alekss Vecvanags<sup>4</sup>, Osvalds Pugovics<sup>1</sup>, Solveiga Grinberga<sup>1</sup>, Maija Dambrova<sup>1,3</sup>, Arta Kronberga<sup>5</sup>

<sup>1</sup>Latvian Institute of Organic Synthesis, 21 Aizkraukles Str., LV-1006, Riga, Latvia

<sup>2</sup>Department of Applied Pharmacy, Riga Stradins University, 16 Dzirciema Str., Riga, LV-1007, Latvia

<sup>3</sup>Department of Pharmaceutical Chemistry, Riga Stradins University, 16 Dzirciema Str., Riga, LV-1007, Latvia

<sup>4</sup>Institute for Environmental Solutions, "Lidlauks", Priekule parish, Cēsis County, LV-4126, Latvia

<sup>5</sup>Field and Forest, SIA, 2 Izstades Str, Priekule parish, Cēsis County, LV-4126, Latvia

\*Corresponding author e-mail: inga.sile@farm.osi.lv

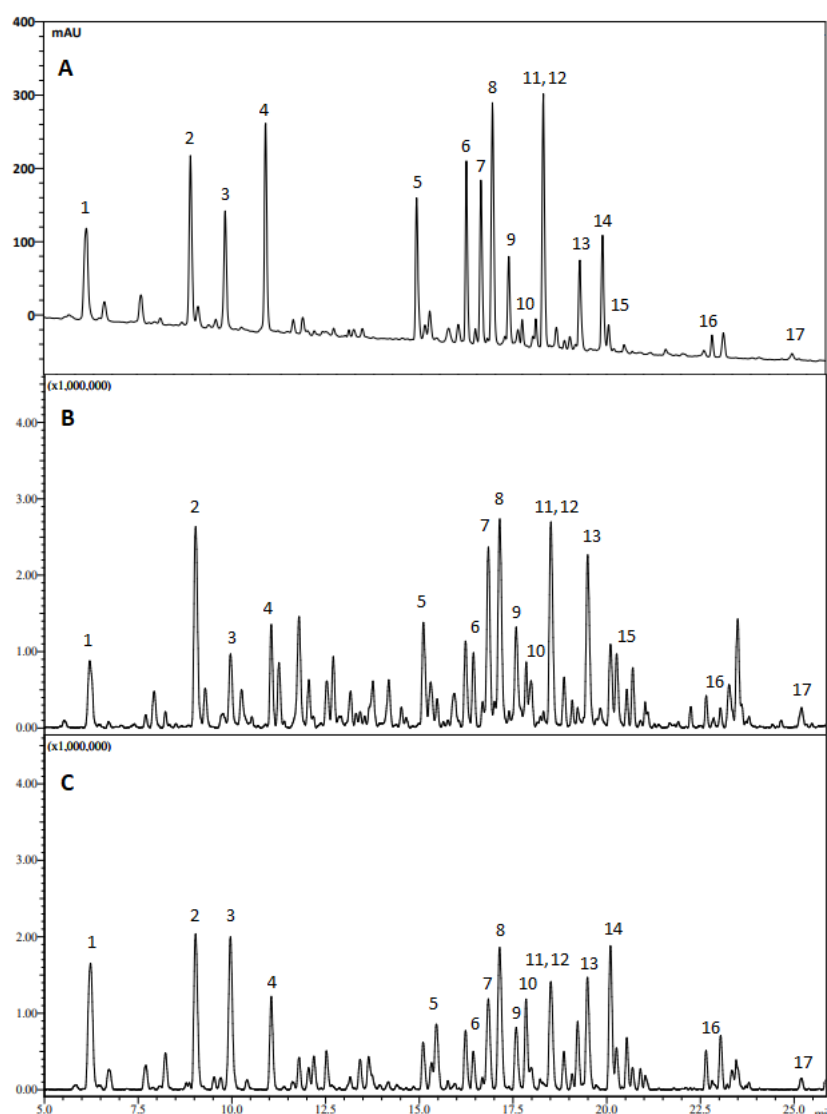

**Figure S1.** Representative chromatogram of *G. hederacea* 70% ethanol extract, (A) UHPLC-PDA (254 nm), (B) and (C) UHPLC-HRMS in positive and negative ionization mode, respectively.

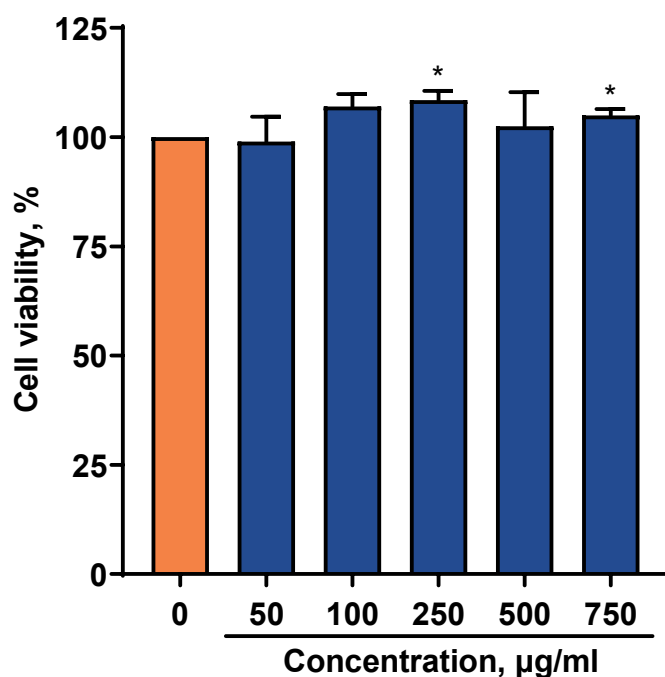

**Figure S2.** Effects of *G. hederacea* extract on bone marrow-derived macrophage viability measured by the MTT assay. Cell viability was tested after 24 h of incubation. Values are represented as the mean  $\pm$  SD of three independent measurements in six parallels. \* - significantly different from the untreated control (unpaired t-test,  $p < 0.05$ ).

**Table S1.** Volatile compound composition (%) of the essential oil of dry plants of *G. hederacea* extract harvested during 2019-2021

| RI <sup>a</sup> | Compound <sup>b</sup>        | Composition range<br>Wild (Flowering) | Composition range<br>Cultivated (Flowering<br>and vegetative) |
|-----------------|------------------------------|---------------------------------------|---------------------------------------------------------------|
| 921             | Cumene                       | 0.9-10.2                              | 0.5-14.2                                                      |
| 929             | 1R- $\alpha$ -Pinene         | n.d                                   | n.d-0.5                                                       |
| 962             | Benzaldehyde                 | n.d                                   | n.d-2.9                                                       |
| 966             | $\beta$ -Thujene             | n.d                                   | n.d-0.4                                                       |
| 980             | 1-Octen-3-ol                 | 2.9-5.9                               | 1.4-10.9                                                      |
| 986             | 3-Octanone                   | n.d-0.8                               | n.d-1.3                                                       |
| 991             | $\beta$ -Myrcene             | 0.8-4.7                               | 1.0-5.7                                                       |
| 994             | 3-Octanol                    | n.d                                   | n.d-0.4                                                       |
| 1028            | $\beta$ -Terpinene           | n.d-0.6                               | n.d-1.5                                                       |
| 1032            | Eucalyptol                   | 7.1-22.6                              | 2.0-28.5                                                      |
| 1038            | cis- $\beta$ -Ocimene        | 4.1-15.0                              | 2.8-37.3                                                      |
| 1049            | trans- $\beta$ -Ocimene      | n.d                                   | n.d-0.4                                                       |
| 1104            | Nonanal                      | n.d                                   | n.d-0.6                                                       |
| 1111            | 1-Octen-3-yl-acetate         | n.d                                   | n.d-0.5                                                       |
| 1316            | 2-Acetyl-4-methylphenol      | n.d                                   | n.d-0.2                                                       |
| 1338            | $\delta$ -Elemene            | n.d                                   | n.d-0.8                                                       |
| 1344            | exo-2-Hydroxycineole acetate | n.d                                   | n.d-0.2                                                       |
| 1357            | Eugenol                      | n.d                                   | n.d-2.1                                                       |
| 1376            | Copaene                      | n.d                                   | n.d-0.6                                                       |
| 1384            | $\beta$ -Bourbonene          | n.d-2.1                               | 0.8-3.8                                                       |
| 1391            | $\beta$ -Elemene             | 1.1-4.4                               | 0.2-9.1                                                       |

|      |                                                             |           |           |
|------|-------------------------------------------------------------|-----------|-----------|
| 1411 | $\alpha$ -Cedrene                                           | n.d       | n.d-0.1   |
| 1419 | Caryophyllene                                               | n.d-0.5   | n.d-0.8   |
| 1432 | $\beta$ -Gurjunene                                          | n.d       | n.d-0.8   |
| 1433 | $\gamma$ -Elemene                                           | n.d-1.1   | n.d-1.2   |
| 1439 | $\alpha$ -Guaiane                                           | n.d       | n.d-0.1   |
| 1454 | Humulene                                                    | n.d-0.7   | n.d-1.6   |
| 1475 | 4-epi- $\alpha$ -Acoradiene                                 | n.d       | n.d-0.3   |
| 1481 | Germacrene D                                                | 15.0-34.1 | 12.6-34.5 |
| 1486 | $\beta$ -Eudesmene                                          | n.d       | n.d-0.4   |
| 1492 | Valencene                                                   | n.d       | n.d-4.1   |
| 1495 | Bicyclogermacrene                                           | 1.5-2.2   | 0.4-4.0   |
| 1505 | $\delta$ -Guaiane                                           | 2.5-4.0   | n.d-8.5   |
| 1513 | $\gamma$ -Cadinene                                          | n.d       | n.d-0.2   |
| 1518 | $\beta$ -Cadinene                                           | n.d-0.9   | n.d-1.2   |
| 1549 | Elemol                                                      | n.d       | n.d-1.1   |
| 1557 | Germacrene B                                                | 17.8-22.4 | 0.3-24.5  |
| 1573 | 1,5-Epoxy- $\alpha$ -salvial-4(14)-ene                      | n.d       | n.d-0.4   |
| 1574 | Germacrene D-4-ol                                           | n.d-0.6   | 0.5-2.2   |
| 1576 | Spathulenol                                                 | n.d-0.6   | 0.3-2.9   |
| 1635 | Patchoulane                                                 | n.d       | n.d-0.4   |
| 1631 | $\gamma$ -Eudesmole                                         | n.d-0.7   | 0.3-1.5   |
| 1638 | Isospathulenol                                              | n.d-0.5   | 0.4-0.8   |
| 1640 | tau.-Cadinol                                                | n.d       | n.d-0.4   |
| 1642 | Cubenol                                                     | n.d       | n.d-0.4   |
| 1653 | $\alpha$ -Cadinol                                           | n.d-1.0   | n.d-1.3   |
| 1655 | Pogostole                                                   | n.d       | n.d-0.6   |
| 1681 | $\alpha$ -Santalol                                          | n.d       | n.d-0.3   |
| 1688 | Eudesma-4(15),7-dien-1 $\beta$ -ol                          | n.d       | n.d-0.3   |
| 1694 | Eremophila-1,11-dien-9-one                                  | n.d       | n.d-0.4   |
| 1695 | ent-Germacra-4(15),5,10(14)-trien-1 $\beta$ -ol             | n.d       | n.d-0.8   |
| 1700 | $\alpha$ -trans-Bergamotenol                                | n.d       | n.d-0.4   |
| 1744 | $\alpha$ -Mintsulfide                                       | n.d       | n.d-0.2   |
| 1763 | Lanceol, cis                                                | n.d       | n.d-0.6   |
| 1777 | 15-Hydroxy- $\alpha$ -muurolene                             | n.d-0.8   | n.d-0.8   |
| 1826 | 8-Keto-ylangenal                                            | n.d       | n.d-1.2   |
| 1844 | Hexahydrofarnesyl acetone                                   | n.d-0.6   | n.d-1.1   |
| 1859 | Ethanone, 1-[6-hydroxy-2-(1-methylethenyl)-5-benzofuranyl]- | n.d       | n.d-0.6   |
| 1939 | Verrucarol                                                  | n.d       | n.d-1.4   |
| 2073 | Thunbergol                                                  | n.d       | n.d-0.8   |
| 2085 | E-15-Heptadecenal                                           | n.d       | n.d-1.2   |
| 2098 | Methyl linolenate                                           | n.d       | 0.3-4.2   |
| 2114 | Phytol                                                      | 2.7-5.7   | 0.3-5.0   |
| 2153 | Ethyl 9 $\alpha$ -linolenate                                | n.d       | n.d-1.7   |

<sup>a</sup> Retention indexes (RI) determined on HP-5MS capillary column

<sup>b</sup> Based on NIST (National Institute of Standards and Technology) MS search 2.2 library

n.d. – not detected

**Table S2.** Locations of the collected wild *G. hederacea* accessions

| Accession denomination | Municipality | Latitude     | Longitude    | Elevation |
|------------------------|--------------|--------------|--------------|-----------|
| GH01                   | Ainaži       | 57°52'12.2"N | 24°38'15.7"E | 48 m      |
| GH02                   | Viļaka       | 57°10'47.9"N | 27°40'51.2"E | 94 m      |
| GH03                   | Sigulda      | 57°09'14.2"N | 24°53'54.5"E | 98 m      |

**Table S3.** MRM parameters applied for the analysis of flavonoids in *G. hederacea* extract

| Compound                  | MS/MS                | Cone, V | Collision energy, eV |
|---------------------------|----------------------|---------|----------------------|
| Apigenin 7-O-glucoside    | 433 > 271            | 30      | 15                   |
| Kaempferol 3-O-rutinoside | 595 > 287            | 30      | 15                   |
| Rutin                     | 611 > 303            | 30      | 20                   |
| Hyperoside                | 465 > 303            | 30      | 15                   |
| Luteolin 7-O-glucoside    | 449 > 287            | 30      | 15                   |
| Apigenin                  | 271 > 111, 271 > 163 | 30      | 30                   |
| Luteolin                  | 287 > 121, 287 > 165 | 25      | 30                   |

**Table S4.** MRM parameters applied for the analysis of phenolic acids in *G. hederacea* extract

| Compound         | MS/MS     | Cone, V | Collision energy, eV |
|------------------|-----------|---------|----------------------|
| Chlorogenic acid | 353 > 191 | 20      | 15                   |
| Rosmarinic acid  | 359 > 161 | 20      | 15                   |
| Caffeic acid     | 179 > 135 | 25      | 15                   |
